# Efficacy of Postoperative Patient-controlled and Continuous Infusion Epidural Analgesia versus Intravenous Patient-controlled Analgesia with Opioids

## A Meta-analysis

Christopher L. Wu, M.D.,\* Seth R. Cohen, B.S.,† Jeffrey M. Richman, M.D.,‡ Andrew J. Rowlingson, B.A.,§ Genevieve E. Courpas, B.A.,§ Kristin Cheung, M.D.,|| Elaina E. Lin, B.A.,# Spencer S. Liu, M.D.\*\*

### CME

This article has been selected for the *Anesthesiology* CME Program. After reading the article, go to <http://www.asahq.org/journal-cme> to take the test and apply for Category 1 credit. Complete instructions may be found in the CME section at the back of this issue.

The authors performed a meta-analysis and found that epidural analgesia overall provided superior postoperative analgesia compared with intravenous patient-controlled analgesia. For all types of surgery and pain assessments, all forms of epidural analgesia (both continuous epidural infusion and patient-controlled epidural analgesia) provided significantly superior postoperative analgesia compared with intravenous patient-controlled analgesia, with the exception of hydrophilic opioid-only epidural regimens. Continuous epidural infusion provided statistically significantly superior analgesia *versus* patient-controlled epidural analgesia for overall pain, pain at rest, and pain with activity; however, patients receiving continuous epidural infusion had a significantly higher incidence of nausea–vomiting and motor block but lower incidence of pruritus. In summary, almost without exception, epidural analgesia, regardless of analgesic agent, epidural regimen, and type and time of pain assessment, provided superior postoperative analgesia compared to intravenous patient-controlled analgesia.

DESPITE the availability of postoperative pain guidelines,<sup>1</sup> postoperative pain continues to be undertreated<sup>2,3</sup> and may result in a variety of unfavorable short- and long-term outcomes.<sup>4–6</sup> Of the two major analgesic options (epidural analgesia *vs.* systemic opioids) after inpatient surgery, the overall benefits of postoperative epidural analgesia on mortality and major morbidity are controversial with available larger observational, randomized controlled trials and meta-analyses equivocal for the efficacy of epidural analgesia in improving perioperative outcomes.<sup>7–14</sup> However, systematic analysis of available nonrandomized and randomized trials<sup>15,16</sup> seem to indicate that postoperative epidural an-

algesia will provide superior analgesia when compared with that from systemic opioids.

Even though epidural analgesia seems to provide better postoperative pain control than systemic opioids, this comparison in some sense may not be meaningful because categorizing systemic opioids (which includes intramuscular, subcutaneous, intravenous, and intravenous patient-controlled analgesia [PCA]) into a single generic entity may not reflect the actual clinical use of postoperative opioids, which may be primarily delivered *via* intravenous PCA.<sup>1,17,18</sup> To truly determine the analgesic value of epidural analgesia for postoperative pain management, it would be appropriate to compare patient-controlled epidural analgesia (PCEA) with intravenous PCA, which many believe is the accepted standard for delivery of opioid analgesia postoperatively. We performed a meta-analysis of the analgesic efficacy of postoperative PCEA and continuous epidural infusion (CEI) analgesia to intravenous PCA with opioid. To minimize duplication of data and results from our previous publication,<sup>15</sup> we used a different literature search strategy and attempted to acquire additional unpublished data from studies that had not been available for our previous meta-analysis.

## Materials and Methods

The National Library of Medicine's PubMed database was searched for the time period 1966 to August 4, 2004. PubMed was searched for all articles containing text words *PCA* or *patient-controlled analgesia* (9,122 articles), which was combined with the text word *epidural* (25,480 articles) using the usual Boolean meanings of *AND*. The result was 757 articles. This search was limited to the English language (650 articles) and then the Randomized Controlled Trials function, which resulted in 299 abstracts. The full article of each of the 299 abstracts was then reviewed by one of the authors for inclusion into the meta-analysis. No minimum sample sizes were invoked for inclusion of studies in the analysis. Any disputes were resolved by agreement of at least two reviewers. After selecting the initial articles, the authors' personal files were checked for any additional studies.

For the purposes of this meta-analysis, postoperative

\* Associate Professor, ‡ Assistant Professor, § Research Associate, || Senior Instructor, # Medical Student, Department of Anesthesiology and Critical Care Medicine, The Johns Hopkins University, Baltimore, Maryland. † Medical Student, Philadelphia College of Osteopathic Medicine, Philadelphia, Pennsylvania. \*\* Clinical Professor, Department of Anesthesiology, Virginia Mason Medical Center, University of Washington, Seattle, Washington.

Received from the Department of Anesthesiology and Critical Care Medicine, The Johns Hopkins University, Baltimore, Maryland. Submitted for publication January 28, 2005. Accepted for publication June 29, 2005. Support was provided solely from institutional and/or departmental sources.

Address reprint requests to Dr. Wu: Johns Hopkins University, Carnegie 280, 600 North Wolfe Street, Baltimore, Maryland 21287. Address electronic mail to: [chwu@jhmi.edu](mailto:chwu@jhmi.edu).

epidural analgesia was defined as a primarily local anesthetic or opioid-based analgesic regimen delivered into the epidural space by CEI or PCEA over at least a 24-h period after a surgical procedure. Patient-controlled analgesia was defined as delivery of analgesic medication either through the epidural or intravenous catheter *via* a mechanical PCA device. Only studies that compared postoperative epidural *versus* intravenous PCA with opioids using visual analog scale (VAS) measurements of pain or a similar substitute (e.g., numerical rating scale) in a randomized fashion were included. Only studies including primarily only adult patients (aged  $\geq 18$  yr) were allowed. To be included in this meta-analysis, studies had to have a clear comparison between epidural analgesia to intravenous PCA without any crossover or concurrent use of the alternate regimen (e.g., concurrent use of intravenous PCA during a dose-finding study of postoperative epidural analgesia, which might include a normal saline epidural control group). Exclusion criteria included articles where VAS pain scores could not be recorded or extrapolated from the data provided in the article. Studies of epidural analgesia that only gave a single epidural dose at the time of surgery (single shot) or by repeated healthcare provider epidural bolus dosing were not included.

Data (e.g., VAS pain scores, number of subjects, type of epidural regimen, study characteristics) were abstracted from each article, and the results were recorded. Data were extrapolated from figures as needed; however, an attempt was made to contact the original authors before extrapolation. Definition of complications was recorded as originally defined by the study. We then recorded the incidence of that complication as reported by the study. For nausea and vomiting, we recorded the higher number if both were reported. In some cases, we could not translate a study's data into an incidence rate. In those studies, we did not enter that data into the database; however, we did incorporate the remainder of that study's data as feasible. For incomplete or uninterpretable data, we made an attempt to contact the corresponding author of the study in question.

All reported data were included as unique observations and subgrouped as described below. VAS or numeric pain scores were converted to a 0–10 scale. VAS data were weighted by sample size and, if a given article measured pain at multiple time points, all measurements were included in the analysis. Therefore, the *n* reported is the total number of patient observations (*i.e.*, one study of 10 patients that measured pain at 3 different time points would contribute an *n* of 30 to the overall sample size). The global mean VAS (weighted for patient observations) and for each postoperative day up to 3 days after surgery between epidural analgesia and intravenous PCA were compared. The data for epidural analgesia were subdivided by type of delivery (CEI *vs.* PCEA), analgesic regimen, and location/type of surgery, with a

subsequent comparison of the epidural analgesia to intravenous PCA performed. All epidural infusions containing local anesthetic were considered equivalent, including those with and without opioid. Both rest and incident (activity) pain were included in the global analysis; however, rest and incident pain were also analyzed separately and again divided into subgroups depending on various epidural characteristics as described above. Finally, the presence of minor complications (*i.e.*, nausea or vomiting [whichever was more frequent], sedation, pruritus, urinary retention, and motor block/weakness) were recorded.

A fixed effect model was used. The level of significance for all tests was set at an  $\alpha$  of 0.05. A Kolmogorov test showed that the data were not normally distributed; instead, both epidural and intravenous PCA opioid data were positively skewed. Analysis of variance was used to compare VAS pain scores between treatment groups. The Bonferroni correction was used for multiple comparisons of postoperative day VAS data. For complication data, comparisons were made between two groups at a time with the chi-square test. All statistical analyses were performed with SPSS 11.5.1 (SPSS Inc., Chicago, IL). After the data compilation was complete, we performed further analyses to assess the validity of our conclusions. We performed an analysis of the file drawer problem (*i.e.*, how many unpublished studies or subjects showing no difference between treatment regimens would be needed to be “discovered” in someone's file drawer to invalidate our results) as described by Rosenthal.<sup>19</sup>

## Results

The search resulted in 299 abstracts of which a total of 48 articles met all inclusion criteria. An additional 2 references from previous systematic reviews and other sources were also included, for a total of 50 articles (appendix). There were a total of 1,625 patients randomly assigned to epidural analgesia and 1,583 patients to intravenous PCA. A total of 251 articles were rejected for the following reasons: 235 were not comparisons of postoperative epidural analgesia *versus* intravenous PCA as defined in the Materials and Methods, 2 were not randomized, 4 did not report usable VAS or numeric pain scores, and 10 included pediatric subjects. The characteristics of included studies are shown in table 1. Articles measured pain after a wide variety of operations and came from medical centers all over the world. Pain was measured after abdominal surgery in 19 studies (38%), with thoracic (*n* = 10, or 20%) and lower extremity (*n* = 7, or 14%) surgery being the next most common types of surgery studied. Only 4% of the epidural patients received local anesthetic alone, whereas 28% (*n* = 14) received opioids alone and 68% (*n* = 34) received local anesthetic and opioid, with the choice of epidural opioid

**Table 1. Characteristics of Included Studies**

|                             |         |
|-----------------------------|---------|
| Surgical site               |         |
| Abdominal                   | 19 (38) |
| Thoracic                    | 10 (20) |
| Lower extremity             | 7 (14)  |
| Cesarean delivery           | 2 (4)   |
| Pelvic                      | 6 (12)  |
| Other                       | 2 (4)   |
| Multiple                    | 3 (6)   |
| Unspecified                 | 1 (2)   |
| Sex                         |         |
| Women                       | 7 (14)  |
| Men                         | 2 (4)   |
| Both                        | 39 (78) |
| Unspecified                 | 2 (4)   |
| Epidural site               |         |
| Lumbar                      | 17 (34) |
| Thoracic                    | 26 (52) |
| Mixed                       | 2 (4)   |
| Unspecified                 | 5 (10)  |
| Study location              |         |
| Europe                      | 24 (48) |
| United States               | 14 (28) |
| Canada                      | 7 (14)  |
| Australia                   | 3 (6)   |
| Asia                        | 2 (4)   |
| Epidural type               |         |
| Continuous                  | 34 (68) |
| PCEA                        | 16 (32) |
| Epidural infusion           |         |
| Opioid alone                | 14 (28) |
| Local anesthetic + opioid   | 34 (68) |
| Local anesthetic alone      | 2 (4)   |
| Epidural opioid             |         |
| Morphine                    | 12 (24) |
| Fentanyl                    | 19 (38) |
| Sufentanil                  | 8 (16)  |
| Hydromorphone               | 2 (4)   |
| Mixed                       | 1 (2)   |
| Unspecified                 | 6 (12)  |
| None                        | 2 (4)   |
| Epidural local anesthetic   |         |
| Bupivacaine                 | 24 (48) |
| Ropivacaine                 | 9 (18)  |
| Lidocaine                   | 1 (2)   |
| Unspecified                 | 1 (2)   |
| Other                       | 1 (2)   |
| None                        | 14 (28) |
| Intravenous PCA with opioid |         |
| Morphine                    | 38 (76) |
| Fentanyl                    | 3 (6)   |
| Sufentanil                  | 2 (4)   |
| Hydromorphone               | 2 (4)   |
| Meperidine                  | 1 (2)   |
| Other                       | 4 (8)   |

Data are presented as number (%).

PCA = patient-controlled analgesia; PCEA = patient-controlled epidural analgesia.

being predominantly fentanyl (38%), followed by morphine (24%) and sufentanil (16%). The most commonly used epidural local anesthetic was bupivacaine (48%), followed by ropivacaine (18%). For intravenous PCA, morphine (76%) was most commonly used, followed by fentanyl (6%).

When all studies and observations were combined

(table 2), epidural analgesia overall provided superior postoperative analgesia compared with intravenous PCA with opioids ( $P < 0.001$ ). Epidural analgesia provided significantly superior analgesia overall, for pain at rest, and for pain with activity ( $P < 0.001$ ). The quality of analgesia may be different at different points in the postoperative recovery period, so pain scores were also assessed at different postoperative times. Epidural analgesia overall was superior to intravenous PCA opioid analgesia at all time points ( $P < 0.001$  for each day up to 3 days after surgery) even when analyzed separately by pain at rest or pain with activity (table 2).

Table 3 shows the VAS pain scores for CEI ( $n = 1,272$  subjects) *versus* PCEA ( $n = 353$  subjects) *versus* intravenous PCA ( $n = 1,583$  subjects). For all epidural (CEI or PCEA) comparisons *versus* intravenous PCA overall and for pain at rest and with activity, epidural analgesia provided significantly superior analgesia *versus* intravenous PCA with opioids ( $P < 0.001$ ). When CEI was compared with PCEA, CEI provided significantly superior analgesia ( $P < 0.001$ ) *versus* PCEA for overall pain, pain at rest, and pain with activity (table 3).

When comparing the different types of epidural regimens (opioid alone [hydrophilic *vs.* lipophilic] *vs.* local anesthetic + opioid *vs.* local anesthetic alone), all epidural regimens provided significantly superior analgesia *versus* intravenous PCA for overall pain, pain at rest, and pain with activity (table 4), with the exception of hydrophilic opioid-only regimens, which were primarily delivered *via* a PCA device. Compared with local anesthetic alone or local anesthetic plus opioid, epidural hydrophilic opioid alone provided significantly inferior analgesia ( $P < 0.001$ ), but epidural lipophilic opioid alone provided comparable VAS scores overall and for pain with activity. Epidural local anesthetic plus opioid provided statistically equivalent analgesia (*vs.* epidural local anesthetic alone) for overall pain and pain with activity but inferior analgesia for pain at rest as compared with local anesthetic alone (table 4).

Finally, epidural analgesia overall provided significantly superior analgesia ( $P < 0.001$ ) compared with intravenous PCA with opioids for all regions of surgery examined (thoracic, pelvic, abdominal, cesarean delivery, lower extremity, and multiple locations) (table 5). Studies where location of surgery was defined as "other" or "not specified" ( $n < 110$  weighted observations for each group) were not included in these analyses. Rates for complications are shown in table 6. Compared with intravenous PCA, the epidural group had a lower incidence of nausea-vomiting and sedation but a higher incidence of pruritus, urinary retention, and motor block. When comparing CEI with PCEA, CEI provided statistically significantly superior analgesia ( $P < 0.001$ ) *versus* PCEA for overall pain, pain at rest, and pain with activity; however, patients receiving CEI had a significantly higher incidence of nausea-vomiting and motor

**Table 2. Aggregate VAS Pain Data**

| Parameter                   | Epidural Analgesia (N = 1,625) | Intravenous PCA (N = 1,583) | P Value |
|-----------------------------|--------------------------------|-----------------------------|---------|
| Overall data                |                                |                             |         |
| All data                    | 2.1 ± 1.3 (n = 7,744)          | 3.2 ± 1.6 (n = 7,666)       | < 0.001 |
| Pain at rest—all data       | 1.6 ± 1.0 (4,482)              | 2.5 ± 1.2 (4,507)           | < 0.001 |
| Pain with activity—all data | 2.8 ± 1.3 (3,262)              | 4.1 ± 1.7 (3,159)           | < 0.001 |
| Postoperative day 0         |                                |                             |         |
| All data                    | 2.2 ± 1.6 (n = 1,416)          | 4.1 ± 1.6 (n = 1,469)       | < 0.001 |
| Pain at rest                | 1.9 ± 1.5 (941)                | 3.6 ± 1.4 (964)             | < 0.001 |
| Pain with activity          | 2.9 ± 1.6 (475)                | 5.0 ± 1.6 (505)             | < 0.001 |
| Postoperative day 1         |                                |                             |         |
| All data                    | 2.4 ± 1.3 (n = 2,625)          | 3.6 ± 1.5 (n = 2,612)       | < 0.001 |
| Pain at rest                | 1.6 ± 0.9 (1,510)              | 2.6 ± 0.9 (1,522)           | < 0.001 |
| Pain with activity          | 3.4 ± 1.0 (1,115)              | 4.9 ± 1.1 (1,090)           | < 0.001 |
| Postoperative day 2         |                                |                             |         |
| All data                    | 2.3 ± 1.2 (n = 2,022)          | 3.0 ± 1.4 (n = 1,971)       | < 0.001 |
| Pain at rest                | 1.6 ± 0.9 (1,125)              | 2.1 ± 0.8 (1,121)           | < 0.001 |
| Pain with activity          | 3.2 ± 1.0 (897)                | 4.3 ± 1.0 (850)             | < 0.001 |
| Postoperative day 3         |                                |                             |         |
| All data                    | 1.4 ± 0.9 (n = 1,628)          | 1.8 ± 1.2 (n = 1,581)       | < 0.001 |
| Pain at rest                | 1.2 ± 0.8 (874)                | 1.7 ± 1.1 (868)             | < 0.001 |
| Pain with activity          | 1.5 ± 1.0 (754)                | 2.0 ± 1.4 (693)             | < 0.001 |

Data are visual analog scale (VAS; 0–10) pain scores presented as mean ± SD.

n = weighted number of observations for each parameter; N = actual number of patients per group; PCA = patient-controlled analgesia with opioid.

block but lower incidence of pruritus. Within the epidural group, the majority of the subjects with motor block received CEI. Finally, we calculated the number of file drawer subjects needed to invalidate our results to be 2,567 subjects.

## Discussion

Although epidural analgesia has been shown to provide superior analgesia compared with systemic opioids in systematic reviews,<sup>15,16</sup> the analgesic efficacy of PCEA or CEI compared with the accepted standard, intravenous PCA, has not been separately assessed. We per-

formed a meta-analysis of randomized controlled trials and found that when compared with intravenous PCA, PCEA and CEI overall provided significantly superior postoperative analgesia at all time intervals up to 3 days after surgery. Epidural analgesia in every combination, with the exception of hydrophilic opioid-alone regimens, provided superior postoperative analgesia compared with intravenous PCA with opioids. It also seemed that CEI provided superior analgesia compared with PCEA and that epidural local anesthetics with or without opioid provided superior analgesia *versus* epidural opioid alone.

Although our current study is similar to our previous

**Table 3. PCEA VAS Pain Data**

| Parameter                   | CEI (N = 1272)        | PCEA (N = 353)        | Intravenous PCA (N = 1583) |
|-----------------------------|-----------------------|-----------------------|----------------------------|
| All data                    | 2.0 ± 1.2 (n = 5,908) | 2.3 ± 1.4 (n = 1,836) | 3.2 ± 1.6 (n = 7,766)      |
|                             | $P < 0.001$           |                       | $P < 0.001$                |
|                             | $P < 0.001$           |                       |                            |
| Pain at rest—all data       | 1.5 ± 1.0 (n = 3,323) | 1.8 ± 1.2 (n = 1,159) | 2.5 ± 1.2 (n = 4,507)      |
|                             | $P < 0.001$           |                       | $P < 0.001$                |
|                             | $P < 0.001$           |                       |                            |
| Pain with activity—all data | 2.7 ± 1.3 (n = 2,585) | 3.2 ± 1.4 (n = 677)   | 4.1 ± 1.7 (n = 3,159)      |
|                             | $P < 0.001$           |                       | $P < 0.001$                |
|                             | $P < 0.001$           |                       |                            |

Data are visual analog scale (VAS) pain scores presented as mean ± SD.

P value represents comparison of intravenous patient-controlled analgesia with opioid (PCA) vs. patient-controlled epidural analgesia (PCEA) and intravenous PCA vs. continuous epidural infusion (CEI) separately (all  $P < 0.001$ ). Individual P values for comparison of CEI with PCEA are shown.

n = weighted number of observations for each parameter; N = actual number of patients per group.

Table 4. Epidural Analgesic Data

| Parameter          | EA Opioid<br>(N = 287)                                   | EA LA +<br>Opioid<br>(N = 1,262) | EA LA<br>(N = 76)      | Intravenous<br>PCA<br>(N = 1,583) | P Values—Intravenous<br>PCA vs.: |         |         |         |         |
|--------------------|----------------------------------------------------------|----------------------------------|------------------------|-----------------------------------|----------------------------------|---------|---------|---------|---------|
|                    |                                                          |                                  |                        |                                   | EAO                              | EAHY    | EALP    | EAL/O   | EAL     |
| All data           | 2.5 ± 1.3<br>(n = 1,024)                                 | 2.1 ± 1.3<br>(n = 6,378)         | 1.9 ± 0.9<br>(n = 342) | 3.2 ± 1.6<br>(n = 7,766)          | < 0.001                          | 1.0     | < 0.001 | < 0.001 | < 0.001 |
|                    | $P < 0.001$                                              |                                  | $P = 0.21$             |                                   |                                  |         |         |         |         |
|                    | EA Hydrophilic Opioid (N = 74)<br>3.0 ± 0.9<br>(n = 258) |                                  |                        |                                   |                                  |         |         |         |         |
|                    | $P < 0.001$                                              |                                  |                        |                                   |                                  |         |         |         |         |
|                    | $P < 0.001$                                              |                                  |                        |                                   |                                  |         |         |         |         |
|                    | EA Lipophilic Opioid (N = 171)<br>2.0 ± 1.1<br>(n = 584) |                                  |                        |                                   |                                  |         |         |         |         |
|                    | $P = 1.0$                                                |                                  |                        |                                   |                                  |         |         |         |         |
|                    | $P = 1.0$                                                |                                  |                        |                                   |                                  |         |         |         |         |
| Pain at rest       | 2.2 ± 1.1<br>(n = 775)                                   | 1.5 ± 1.0<br>(n = 3,517)         | 1.2 ± 0.2<br>(n = 190) | 2.5 ± 1.2<br>(n = 4,507)          | < 0.001                          | < 0.001 | < 0.001 | < 0.001 | < 0.001 |
|                    | $P < 0.001$                                              |                                  | $P = 0.003$            |                                   |                                  |         |         |         |         |
|                    | EA Hydrophilic Opioid (N = 74)<br>2.9 ± 0.8<br>(n = 226) |                                  |                        |                                   |                                  |         |         |         |         |
|                    | $P < 0.001$                                              |                                  |                        |                                   |                                  |         |         |         |         |
|                    | $P < 0.001$                                              |                                  |                        |                                   |                                  |         |         |         |         |
|                    | EA Lipophilic Opioid (N = 171)<br>1.7 ± 0.9<br>(n = 418) |                                  |                        |                                   |                                  |         |         |         |         |
|                    | $P = 0.07$                                               |                                  |                        |                                   |                                  |         |         |         |         |
|                    | $P < 0.001$                                              |                                  |                        |                                   |                                  |         |         |         |         |
| Pain with activity | 3.2 ± 1.4<br>(n = 249)                                   | 2.8 ± 1.3<br>(n = 2,861)         | 2.8 ± 0.5<br>(n = 152) | 4.1 ± 1.7<br>(n = 3,159)          | < 0.001                          | 1.0     | < 0.001 | < 0.001 | < 0.001 |
|                    | $P < 0.001$                                              |                                  | $P = 1.00$             |                                   |                                  |         |         |         |         |
|                    | EA Hydrophilic Opioid (N = 74)<br>3.8 ± 1.3<br>(n = 52)  |                                  |                        |                                   |                                  |         |         |         |         |
|                    | $P = 0.003$                                              |                                  |                        |                                   |                                  |         |         |         |         |
|                    | $P = 0.009$                                              |                                  |                        |                                   |                                  |         |         |         |         |
|                    | EA Lipophilic Opioid (N = 171)<br>2.7 ± 1.1<br>(n = 166) |                                  |                        |                                   |                                  |         |         |         |         |
|                    | $P = 1.00$                                               |                                  |                        |                                   |                                  |         |         |         |         |
|                    | $P = 1.00$                                               |                                  |                        |                                   |                                  |         |         |         |         |

Data presented as mean ± SD. Of the 287 epidural opioid-alone subjects, 171 were classified as lipophilic alone (EALP), 74 were classified as hydrophilic alone (EAHY), and 42 were unspecified.

P value represents comparison of only two groups at one time. Individual P values for comparison between two epidural analgesic regimens are shown. Individual P values for comparisons between intravenous patient-controlled analgesia with opioid (PCA) and one other epidural regimen are shown at right.

EA = epidural; EAL = epidural local anesthetic; EAL/O = epidural local anesthetic + opioid; EAO = epidural opioid (all data combined—includes hydrophilic- and lipophilic-only data); LA = local anesthetic; n = weighted number of observations for each parameter; N = actual number of patients per group.

**Table 5. Analgesia by Region of Surgery**

| Location of Surgery | Epidural Analgesia (N = 1,625) | Intravenous PCA (N = 1,583) | P Value |
|---------------------|--------------------------------|-----------------------------|---------|
| Thoracic            | 1.6 ± 1.5 (n = 1,157)          | 2.7 ± 1.8 (n = 1,139)       | < 0.001 |
| Pelvic              | 2.5 ± 1.2 (678)                | 3.5 ± 1.5 (655)             | < 0.001 |
| Abdominal           | 2.1 ± 1.2 (4,414)              | 3.1 ± 1.7 (4,274)           | < 0.001 |
| Cesarean delivery   | 1.8 ± 1.0 (220)                | 3.0 ± 1.4 (248)             | < 0.001 |
| Lower extremity     | 2.3 ± 1.1 (622)                | 3.4 ± 1.3 (665)             | < 0.001 |
| Multiple            | 3.1 ± 1.3 (452)                | 4.2 ± 1.3 (484)             | < 0.001 |

Data are presented as mean ± SD.

n = weighted number of observations for each parameter and includes both rest and incident pain; N = actual number of patients per group; PCA = patient-controlled analgesia with opioid.

publication,<sup>15</sup> which did include a subgroup analysis showing the superior analgesia of epidural analgesia over intravenous PCA, this study is different because the primary focus was on a comparison of intravenous PCA to PCEA and CEI. Despite the fact that there was overlap in articles assessed between the two studies (35 of 50 articles from the current meta-analysis were used in our previous meta-analysis), this new systematic review contains more clinically relevant information for anesthesiologists because it compares intravenous PCA with both CEI and PCEA (*i.e.*, the current study should not be considered a duplicate publication). Many colleagues, both informally and formally,<sup>18</sup> mentioned that our initial analysis<sup>15</sup> was not clinically meaningful for them because the majority of postoperative systemic opioids were delivered *via* intravenous PCA and because there was no differentiation between CEI and PCEA. As such, we decided to undertake a completely new meta-analysis with different inclusion criteria to reflect typical clinical practice.

The results of our meta-analysis corroborate previous systematic reviews of the analgesic efficacy of postoperative epidural analgesia *versus* systemic opioids, which include but are not limited to intravenous PCA with opioids.<sup>15,16</sup> It may not be surprising that postoperative PCEA and CEI provide significantly superior postoperative analgesia when compared with intravenous PCA with opioids. Unlike that seen with systemic opioids, epidural local anesthetics can block nociceptive input into the central nervous system with the addition of an epidural opioid providing an even greater analgesic ef-

fect.<sup>20,21</sup> The superior analgesia and physiologic<sup>22-24</sup> benefits from epidural analgesia may potentially result in an improvement in perioperative outcomes.<sup>25-30</sup> In addition, perioperative epidural analgesia may decrease postoperative morbidity (*e.g.*, pulmonary complications, myocardial infarction, gastrointestinal motility) and mortality in high-risk patients, although its effect may not be as apparent for low-risk patients or those undergoing lower-risk procedures.<sup>11,31-39</sup>

By allowing individualization of postoperative analgesic requirements, intravenous PCA is considered to be the accepted standard by which opioids are delivered to the hospitalized surgical patient. Intravenous PCA provides significantly superior analgesia compared with conventional “as needed” (intravenous, intramuscular, or subcutaneous) opioid administration.<sup>33,40</sup> Similar to that for intravenous PCA and systemic opioids, PCEA may in one sense be considered the accepted standard for delivery of epidural analgesia. In our analysis, PCEA provided significantly superior analgesia compared with intravenous PCA overall, for each postoperative day, and for pain both at rest and with activity. It was interesting to note that CEI provided superior analgesia *versus* PCEA; however, this may be possibly related to an increase in dose of local anesthetic administered in the CEI group (*i.e.*, subjects receiving PCEA generally use less local anesthetic than those receiving CEI<sup>41</sup>), which may be reflected in the higher incidence of motor block for those receiving CEI.

Use of a local anesthetic-based epidural regimen seems to provide the best postoperative pain control

**Table 6. Complication Rates**

| Parameter         | Epidural Analgesia |                 |                |          | Intravenous PCA | P Value† |
|-------------------|--------------------|-----------------|----------------|----------|-----------------|----------|
|                   | Total              | CEI             | PCEA           | P Value* |                 |          |
| Nausea–vomiting   | 184/680 (27.6%)    | 127/419 (30.3%) | 57/261 (21.8%) | 0.02     | 211/632 (33.4%) | 0.01     |
| Sedation          | 71/247 (28.7%)     | 42/136 (30.9%)  | 29/111 (26.1%) | 0.48     | 91/236 (38.6%)  | 0.03     |
| Pruritus          | 190/579 (32.8%)    | 113/399 (28.3%) | 77/180 (42.8%) | 0.001    | 89/519 (17.1%)  | < 0.001  |
| Urinary retention | 22/203 (10.8%)     | 19/145 (13.1%)  | 3/58 (5.2%)    | 0.13     | 9/198 (4.5%)    | 0.02     |
| Motor block       | 27/320 (8.4%)      | 19/67 (28.3%)   | 8/253 (3.2%)   | < 0.001  | 0/65 (0%)       | < 0.001  |

\* Continuous epidural infusion (CEI) vs. patient-controlled epidural analgesia (PCEA). † Epidural/total vs. intravenous patient-controlled analgesia with opioid (PCA).

n = actual number of subjects with symptoms; N = actual number of subjects studied for that symptom; Total = aggregate data of CEI + PCEA.

(table 4). Overall, epidural opioid-only regimens seem to provide superior analgesia compared with intravenous PCA but inferior analgesia compared with local anesthetic-based epidural regimens (*i.e.*, VAS values for epidural opioids are intermediate between that for intravenous PCA and local anesthetic-based epidural regimens). However, when analyzed by hydrophilic *versus* lipophilic opioids, the VAS pain scores for epidural hydrophilic opioid-only regimens (delivered primarily *via* a PCA device) were significantly higher than those for lipophilic opioids and local anesthetic regimens and were for the most part equivalent to those for intravenous PCA. As such, hydrophilic opioid-only epidural solutions should not be routinely administered *via* a PCA device for postoperative pain management. In addition, our data also suggest that epidural analgesia would provide superior analgesia compared with intravenous PCA for all types of surgery (table 5). This may be important not only in allowing patients to actively participate in physiotherapy but also in potentially decreasing the incidence of chronic postoperative pain.<sup>4</sup>

The overall complication rates reported are similar to those seen in other sources, although the actual incidence in clinical practice may vary depending on the epidural agent used and how the specific complication is defined. The cumulative incidence of nausea-vomiting from epidural analgesia may be as high as 45–80%,<sup>42,43</sup> and that for pruritus may be as high as 60%.<sup>44</sup> However, some large-scale observational PCEA studies note a lower incidence of nausea-vomiting (3.8–14.8%), pruritus (1.8–16.7%), and motor block (0.1–2%) compared with our findings.<sup>45,46</sup>

There are several limitations to this study, some of which pertain specifically with the issue examined, whereas others relate to the general use of meta-analysis. The clinical significance of our findings despite the presence of a statistical difference is unclear (*i.e.*, is this a clinically meaningful difference?). We were unable to determine the percentage of patients with moderate-severe pain, the percentage of maximum total pain relief, the sum of the pain intensity difference, or the percentage pain intensity difference<sup>47,48</sup> because of the limitations of available data. In addition, attempting to achieve the lowest possible pain score, a worthy objective *per se*, may not always be the most desirable or only goal of a postoperative analgesic regimen and must be considered in the overall context of what may be sacrificed (*i.e.*, side effects) to achieve this objective. For example, our data suggest that patients receiving CEI have lower pain scores than those receiving PCEA (table 3); however, this superior analgesia may come at a cost (*i.e.*, increased nausea-vomiting and motor block; table 6). In addition, the generalizability of our results to the typical clinical population is difficult to assess, in part because of the protocolization present in randomized trials and the rate of failure or dislodgement of postop-

erative epidural catheters (reported from 6 to 25%<sup>49–51</sup>), which may limit the analgesic efficacy of epidural analgesia. We also did not weight the quality scoring of the randomized controlled trials used or assess the articles in a blinded fashion because the role of quality assessments in meta-analysis is unclear.<sup>52–55</sup>

In addition, that there may be discrepancies between meta-analyses and subsequent large randomized controlled trials.<sup>56</sup> This may be related in part to the presence of publication bias where only positive findings are published primarily in English-language journals.<sup>57,58</sup> Although we limited our analysis to the English language, only 8 non-English PubMed articles would have qualified for inclusion in our meta-analysis, and the inclusion of these articles (5 studies [n = 395 out of 514 subjects total] of which showed that epidural analgesia produced superior analgesia *vs.* intravenous PCA) would not have changed our results. The effect of excluding non-English trials on the results of a meta-analysis is equivocal, with some data suggesting that exclusion of trials published in non-English may actually result in a more conservative estimate of the treatment effect.<sup>59</sup>

In summary, we performed a meta-analysis of randomized controlled trials to determine the analgesic efficacy of postoperative epidural analgesia compared with intravenous PCA with opioids. Epidural analgesia provided a statistically and clinically significant improvement in postoperative pain control compared with intravenous PCA with opioids—regardless of analgesic regimen (local anesthetic with or without opioid or opioid alone), type of epidural analgesia (CEI *vs.* PCEA), site of surgical incision, or measured pain outcomes (rest or incident pain), with the exception of hydrophilic opioid-only regimens. CEI provided statistically superior (although not necessarily clinically superior) postoperative analgesia *versus* PCEA, but with a higher incidence of nausea-vomiting and motor block. Our results suggest that postoperative PCEA and CEI may provide significantly superior analgesia when compared with intravenous PCA, the accepted standard for delivery of postoperative opioids. These analgesic benefits, along with other potential benefits,<sup>60–65</sup> should be weighed against the risks<sup>66–71</sup> of epidural analgesia when considering the route of delivery for postoperative analgesia, and the balance between these risks and benefits should be determined for each surgical patient.<sup>72</sup> When feasible, clinicians may also consider using PCEA with a local anesthetic-based solution over CEI to minimize analgesic-related side effects while providing superior postoperative analgesia compared with intravenous PCA with opioids.

The authors thank the following colleagues for taking the time out of their busy schedules to attempt to review and retrieve their original data for incorporation in this meta-analysis. The authors greatly appreciate their time and effort.

Stephen Barratt, Ph.D., F.A.N.Z.C.A. (Consultant, Department of Anesthesia

and Pain Management, Royal North Shore Hospital, St. Leonards, Australia); Honorio Benzon, M.D. (Professor of Anesthesiology, Department of Anesthesiology, Northwestern University Feinberg School of Medicine, Chicago, Illinois); Xavier Capdevila, M.D., Ph.D. (Professor, Department of Anesthesiology, Lapeyronie University Hospital, Montpellier, France); Phoon P. Chen, M.D., F.H.K.A.M. (Honorary Associate Professor, Department Anesthesia and Intensive Care, Chinese University of Hong Kong, Hong Kong, SAR of China); David Cooper, F.R.C.A. (Consultant Anesthetist, James Cook University Hospital, Middlesbrough, United Kingdom); Rob Dyer, F.C.A. (SA) (Senior Specialist, Department of Anesthesia, Groote Schuur Hospital, Cape Town, South Africa); Charles Fisher, M.D., M.H.Sc., F.R.C.S.C. (Department of Orthopaedics, Vancouver Hospital and Health Sciences Centre, Vancouver, Canada); Per Flisberg, M.D., Ph.D. (Consultant, Department of Anesthesia and Pain Medicine, Royal Perth Hospital, Perth, Australia); Johan Lundberg, M.D., Ph.D. (Adjunct Professor of Anesthesiology, Dartmouth Medical School, Hanover, New Hampshire); Edward Norris, M.D. (Associate Professor, Department of Anesthesiology and Critical Care Medicine, The Johns Hopkins University, Baltimore, Maryland); Mark Priestley, M.B.B.S., F.A.N.Z.C.A. (Consultant, Department of Anesthesia, Westmead Hospital, Westmead, Australia); Yehuda (Udi) Shavit (Professor, Department of Psychology, Hebrew University, Jerusalem, Israel); Eugene Viscusi, M.D. (Associate Professor, Department of Anesthesiology, Jefferson Medical College, Thomas Jefferson University, Philadelphia, Pennsylvania); and Avi Weinbroum, M.D. (Director, Post-Anesthesia Care Unit and Animal Research Laboratory, Tel Aviv Sourasky Medical Center, Tel Aviv, Israel).

## References

- Rosenquist RW, Rosenberg J, United States Veterans Administration: Postoperative pain guidelines. *Reg Anesth Pain Med* 2003; 28:279-88
- Apfelbaum JL, Chen C, Mehta SS, Gan TJ: Postoperative pain experience: Results from a national survey suggest postoperative pain continues to be undermanaged. *Anesth Analg* 2003; 97:534-40
- Wu CL, Berenholtz SM, Pronovost PJ, Fleisher LA: Systematic review and analysis of postdischarge symptoms after outpatient surgery. *ANESTHESIOLOGY* 2002; 96:994-1003
- Perkins FM, Kehlet H: Chronic pain as an outcome of surgery: A review of predictive factors. *ANESTHESIOLOGY* 2000; 93:1123-33
- Wu CL, Naqibuddin M, Fleisher LA: Measurement of patient satisfaction as an outcome of regional anesthesia and analgesia. *Reg Anesth Pain Med* 2001; 26:196-208
- Wu CL, Naqibuddin M, Rowlingson AJ, Lietman SA, Jermyn RM, Fleisher LA: The effect of pain on health-related quality of life in the immediate postoperative period. *Anesth Analg* 2003; 97:1078-85
- Wu CL, Hsu W, Richman JM, Raja SN: Postoperative cognitive function as an outcome of regional anesthesia and analgesia. *Reg Anesth Pain Med* 2004; 29:257-68
- Rigg JR, Jamrozik K, Myles PS, Silbert BS, Peyton PJ, Parsons RW, Collins KS, MASTER Anaesthesia Trial Study Group: Epidural anaesthesia and analgesia and outcome of major surgery: A randomised trial. *Lancet* 2002; 359:1276-82
- Rodgers A, Walker N, Schug S, McKee A, Kehlet H, van Zundert A, Sage D, Futter M, Saville G, Clark T, MacMahon S: Reduction of postoperative mortality and morbidity with epidural or spinal anaesthesia: Results from overview of randomised trials. *BMJ* 2000; 321:1493-6
- Park WY, Thompson JS, Lee KK: Effect of epidural anesthesia and analgesia on perioperative outcome: A randomized, controlled Veterans Affairs cooperative study. *Ann Surg* 2001; 234:560-9
- Beattie WS, Badner NH, Choi P: Epidural analgesia reduces postoperative myocardial infarction: A meta-analysis. *Anesth Analg* 2001; 93:853-8
- Bode Jr, RH, Lewis KP, Zarich SW, Pierce ET, Roberts M, Kowalchuk GJ, Satwicz PR, Gibbons GW, Hunter JA, Espanola CC: Cardiac outcome after peripheral vascular surgery: Comparison of general and regional anesthesia. *ANESTHESIOLOGY* 1996; 84:3-13
- Norris EJ, Beattie C, Perler BA, Martinez EA, Meinert CL, Anderson GF, Grass JA, Sakima NT, Gorman R, Achuff SC, Martin BK, Minken SL, Williams GM, Traystman RJ: Double-masked randomized trial comparing alternate combinations of intraoperative anesthesia and postoperative analgesia in abdominal aortic surgery. *ANESTHESIOLOGY* 2001; 95:1054-67
- O'Hara DA, Duff A, Berlin JA, Poses RM, Lawrence VA, Huber EC, Noveck H, Strom BL, Carson BL: The effect of anesthetic technique on postoperative outcomes in hip fracture repair. *ANESTHESIOLOGY* 2000; 92:947-57
- Block BM, Liu SS, Rowlingson AJ, Cowan AR, Cowen JA, Wu CL: Efficacy of postoperative epidural analgesia versus systemic opioids: A meta-analysis. *JAMA* 2003; 290:2455-63
- Dolin SJ, Cashman JN, Bland JM: Effectiveness of acute postoperative pain management: I. Evidence from published studies. *Br J Anaesth* 2002; 89:409-23
- Stamer UM, Mpasi N, Stuber F, Maier C: A survey of acute pain services in Germany and a discussion of international survey data. *Reg Anesth Pain Med* 2002; 27:125-31
- Jankowski CJ, Warner DO: Parenteral vs epidural analgesia for postoperative pain. *JAMA* 2004; 291:1197-8
- Rosenthal R: Meta-analysis: A review. *Psychosom Med* 1991; 53:247-71
- Kaneko M, Saito Y, Kiriha Y, Collins JG, Kosaka Y: Synergistic antinociceptive interaction after epidural coadministration of morphine and lidocaine in rats. *ANESTHESIOLOGY* 1994; 80:137-50
- Saito Y, Kaneko M, Kiriha Y, Sakura S, Kosaka Y: Interaction of intrathecal infused morphine and lidocaine in rats: I. Synergistic antinociceptive effects. *ANESTHESIOLOGY* 1998; 89:1455-63
- Lattermann R, Carli F, Schricker T: Epidural blockade suppresses lipolysis during major abdominal surgery. *Reg Anesth Pain Med* 2002; 27:469-75
- Hollmann MW, Difazio CA, Durieux ME: Ca-signaling G-protein-coupled receptors: A new site of local anesthetic action? *Reg Anesth Pain Med* 2001; 26:565-71
- Hollmann MW, Wiecek KS, Smart M, Durieux ME: Epidural anesthesia prevents hypercoagulation in patients undergoing major orthopedic surgery. *Reg Anesth Pain Med* 2001; 26:215-22
- Correll DJ, Viscusi ER, Grunwald Z, Moore JH: Epidural analgesia compared with intravenous morphine patient-controlled analgesia: Postoperative outcome measures after mastectomy with immediate TRAM flap breast reconstruction. *Reg Anesth Pain Med* 2001; 26:444-9
- Barratt SM, Smith RC, Kee AJ, Mather LE, Cousins MJ: Multimodal analgesia and intravenous nutrition preserves total body protein following major upper gastrointestinal surgery. *Reg Anesth Pain Med* 2002; 27:15-22
- Brodner G, Van Aken H, Hertle L, Fobker M, Von Eckardstein A, Goeters C, Buerkle H, Harks A, Kehlet H: Multimodal perioperative management—reduces hormonal and metabolic stress and improves convalescence after major urologic surgery. *Anesth Analg* 2001; 92:1594-600
- Kehlet H, Holte K: Effect of postoperative analgesia on surgical outcome. *Br J Anaesth* 2001; 87:62-72
- Carli F, Mayo N, Klubien K, Schricker T, Trudel J, Belliveau P: Epidural analgesia enhances functional exercise capacity and health-related quality of life after colonic surgery: Results of a randomized trial. *ANESTHESIOLOGY* 2002; 97:540-9
- Gottschalk A, Smith DS, Jobs DR, Kennedy SK, Lally SE, Noble VE, Grugan KF, Seifert HA, Cheung A, Malkowicz SB, Gutsche BB, Wein AJ: Preemptive epidural analgesia and recovery from radical prostatectomy: A randomized controlled trial. *JAMA* 1998; 279:1076-82
- Liu S, Carpenter RL, Neal JM: Epidural anesthesia and analgesia: Their role in postoperative outcome. *ANESTHESIOLOGY* 1995; 82:1474-506
- Wu CL, Fleisher LA: Outcomes research in regional anesthesia and analgesia. *Anesth Analg* 2000; 91:1232-42
- Ballantyne JC, Carr DB, deFerranti S, Suarez T, Lau J, Chalmers TC, Angelillo IF, Mosteller F: The comparative effects of postoperative analgesic therapies on pulmonary outcome: Cumulative meta-analyses of randomized, controlled trials. *Anesth Analg* 1998; 86:598-612
- Wu CL, Hurley RW, Anderson GF, Herbert R, Rowlingson AJ, Fleisher LA: The effect of perioperative epidural analgesia on patient mortality and morbidity in the Medicare population. *Reg Anesth Pain Med* 2004; 29:525-33
- Liu SS: Anesthesia and analgesia for colon surgery. *Reg Anesth Pain Med* 2004; 29:52-7
- Liu SS, Block BM, Wu CL: Effects of perioperative central neuraxial analgesia on outcome after coronary artery bypass surgery: A meta-analysis. *ANESTHESIOLOGY* 2004; 101:153-61
- Wu CL, Anderson GF, Herbert R, Lietman SA, Fleisher LA: Effect of postoperative epidural analgesia on morbidity and mortality after total hip replacement surgery in Medicare patients. *Reg Anesth Pain Med* 2003; 28:271-8
- Liu SS: Bank robbers and outcomes research. *Reg Anesth Pain Med* 2003; 28:262-4
- Neal JM, Wilcox RT, Allen HW, Low DE: Near-total esophagectomy: the influence of standardized multimodal management and intraoperative fluid restriction. *Reg Anesth Pain Med* 2003; 28:328-34
- Walder B, Schafer M, Henzi I, Tramer MR: Efficacy and safety of patient-controlled opioid analgesia for acute postoperative pain: A quantitative systematic review. *Acta Anaesthesiol Scand* 2001; 45:795-804
- Assad SA, Isaacson SA, Wu CL: An update on patient-controlled epidural analgesia. *Techniques Reg Anesth Pain Med* 2003; 7:127-32
- Borgeat A, Ekatostramis G, Schenker CA: Postoperative nausea and vomiting in regional anesthesia: A review. *ANESTHESIOLOGY* 2003; 98:530-47
- Gedney JA, Liu EH: Side-effects of epidural infusions of opioid bupivacaine mixtures. *Anaesthesia* 1998; 53:1148-55
- Kjellberg F, Tramer MR: Pharmacological control of opioid-induced pruritus: A quantitative systematic review of randomized trials. *Eur J Anaesthesiol* 2001; 18:346-57
- Wigfull J, Welchew E: Survey of 1057 patients receiving postoperative patient-controlled epidural analgesia. *Anaesthesia* 2001; 56:70-5
- Liu SS, Allen HW, Olsson GL: Patient-controlled epidural analgesia with bupivacaine and fentanyl on hospital wards: Prospective experience with 1,030 surgical patients. *ANESTHESIOLOGY* 1998; 88:688-95
- Farrar JT, Portenoy RK, Berlin JA, Kinman JL, Strom BL: Defining the clinically important difference in pain outcome measures. *Pain* 2000; 88:287-94
- Farrar JT, Berlin JA, Strom BL: Clinically important changes in acute pain outcome measures: A validation study. *J Pain Symptom Manage* 2003; 25:406-11
- Scott DA, Beilby DS, McClymont C: Postoperative analgesia using epidural

infusions of fentanyl with bupivacaine: A prospective analysis of 1,014 patients. *ANESTHESIOLOGY* 1995; 83:727-37

50. Ready LB: Acute pain: Lessons learned from 25,000 patients. *Reg Anesth Pain Med* 1999; 24:499-505

51. de Leon-Casasola OA, Parker B, Lema MJ, Harrison P, Massey J: Postoperative epidural bupivacaine-morphine therapy: Experience with 4,227 surgical cancer patients. *ANESTHESIOLOGY* 1994; 81:368-75

52. Moher D, Pham B, Jones A, Cook DJ, Jadad AR, Moher M, Tugwell P, Klassen TP: Does quality of reports of randomised trials affect estimates of intervention efficacy reported in meta-analyses? *Lancet* 1998; 352:609-13

53. Jadad AR, Moore RA, Carroll D, Jenkinson C, Reynolds DJ, Gavaghan DJ, McQuay HJ: Assessing the quality of reports of randomized clinical trials: Is blinding necessary? *Control Clin Trials* 1996; 17:1-12

54. Balk EM, Bonis PA, Moskowitz H, Schmid CH, Ioannidis JP, Wang C, Lau J: Correlation of quality measures with estimates of treatment effect in meta-analyses of randomized controlled trials. *JAMA* 2002; 287:2973-82

55. Clark HD, Wells GA, Huet C, McAlister FA, Salmi LR, Fergusson D, Laupacis A: Assessing the quality of randomized trials: Reliability of the Jadad scale. *Control Clin Trials* 1999; 20:448-52

56. LeLorier J, Gogoi G, Benhaddad A, Lapierre J, Derderian F: Discrepancies between meta-analyses and subsequent large randomized, controlled trials. *N Engl J Med* 1997; 337:536-42

57. Moher D, Pham B, Lawson ML, Klassen TP: The inclusion of reports of randomised trials published in languages other than English in systematic reviews. *Health Technol Assess* 2003; 7:1-90

58. Gogoi G, Derderian F, LeLorier J: Selecting the language of the publications included in a meta-analysis: Is there a Tower of Babel bias? *J Clin Epidemiol* 1995; 48:159-63

59. Juni P, Holenstein F, Sterne J, Barlett C, Egger M: Direction and impact of language bias in meta-analyses of controlled trials: Empirical study. *Int J Epidemiol* 2002; 31:115-23

60. Cassidy Jr, JF Lederhaas G, Cancel DD, Cummings RJ, Loveless EA: A randomized comparison of the effects of continuous thoracic epidural analgesia and intravenous patient-controlled analgesia after posterior spinal fusion in adolescents. *Reg Anesth Pain Med* 2000; 25:246-53

61. Katz J, Cohen L, Schmid R, Chan VW, Wowk A: Postoperative morphine use and hyperalgesia are reduced by preoperative but not intraoperative epidural analgesia: Implications for preemptive analgesia and the prevention of central sensitization. *ANESTHESIOLOGY* 2003; 98:1449-60

62. Matot I, Oppenheim-Eden A, Ratrot R, Baranova J, Davidson E, Eylon S, Peyser A, Liebergall M: Preoperative cardiac events in elderly patients with hip fracture randomized to epidural or conventional analgesia. *ANESTHESIOLOGY* 2003; 98:156-63

63. Buggy DJ, Doherty WL, Hart EM, Pallett EJ: Postoperative wound oxygen tension with epidural or intravenous analgesia: A prospective, randomized, single-blind clinical trial. *ANESTHESIOLOGY* 2002; 97:952-8

64. Mann C, Pouzeratte Y, Boccaro G, Peccoux C, Vergne C, Brunat G, Domergue J, Millat B, Colson P: Comparison of intravenous or epidural patient-controlled analgesia in the elderly after major abdominal surgery. *ANESTHESIOLOGY* 2000; 92:433-41

65. Capdevila X, Barthelet Y, Biboulet P, Ryckwaert Y, Rubenovitch J, d'Athis F: Effects of perioperative analgesic technique on the surgical outcome and duration of rehabilitation after major knee surgery. *ANESTHESIOLOGY* 1999; 91:8-15

66. Horlocker TT, Wedel DJ, Benzon H, Brown DL, Enneking FK, Heit JA, Mulroy MF, Rosenquist RW, Rowlingson J, Tryba M, Yuan CS: Regional anesthesia in the anticoagulated patient: Defining the risks. *Reg Anesth Pain Med* 2003; 28:172-97

67. Horlocker TT, Wedel DJ: Neurologic complications of spinal and epidural anesthesia. *Reg Anesth Pain Med* 2000; 25:83-98

68. Mulroy MF: Systemic toxicity and cardiotoxicity from local anesthetics: Incidence and preventive measures. *Reg Anesth Pain Med* 2002; 27:556-61

69. Moen V, Dahlgren N, Irestedt L: Severe neurological complications after central neuraxial blockades in Sweden 1990-1999. *ANESTHESIOLOGY* 2004; 101:950-9

70. Wang LP, Hauerberg J, Schmidt JF: Incidence of spinal epidural abscess after epidural analgesia: A national 1-year survey. *ANESTHESIOLOGY* 1999; 91:1928-36

71. Auroy Y, Benhamou D, Bagues L, Ecoffey C, Falissard B, Mercier FJ, Bouaziz H, Samii K, Mercier F: Major complications of regional anesthesia in France: The SOS Regional Anesthesia Hotline Service. *ANESTHESIOLOGY* 2002; 97:1274-80

72. Bergqvist D, Wu CL, Neal JM: Anticoagulation and neuraxial regional anesthesia: Perspectives. *Reg Anesth Pain Med* 2003; 28:163-5

2. Barratt SM, Smith RC, Kee AJ, Mather LE, Cousins MJ: Multimodal analgesia and intravenous nutrition preserves total body protein following major upper gastrointestinal surgery. *Reg Anesth Pain Med* 2002; 27:15-22

3. Baxter AD, Laganier S, Samson B, Stewart J, Hull K, Goernert L: A comparison of lumbar epidural and intravenous fentanyl infusions for postthoracotomy analgesia. *Can J Anaesth* 1994; 41:184-91

4. Beilin B, Shavit Y, Trabek E, Mordashev B, Mayburd E, Zeidel A, Bessler H: The effects of postoperative pain management on immune response to surgery. *Anesth Analg* 2003; 97:822-7

5. Benzon HT, Wong HY, Belavic AM Jr, Goodman I, Mitchell D, Lefheit T, Locicero J: A randomized double-blind comparison of epidural fentanyl infusion *versus* patient-controlled analgesia with morphine for postthoracotomy pain. *Anesth Analg* 1993; 76:316-22

6. Bois S, Couture P, Boudreault D, Lacombe P, Fugere F, Girard D, Nadeau N: Epidural analgesia and intravenous patient-controlled analgesia result in similar rates of postoperative myocardial ischemia after aortic surgery. *Anesth Analg* 1997; 85:1233-9

7. Boisseau N, Rabary O, Padovani B, Staccini P, Mouroux J, Grimaud D, Raucoules-Aime M: Improvement of "dynamic analgesia" does not decrease atelectasis after thoracotomy. *Br J Anaesth* 2001; 87:564-9

8. Boylan JF, Katz J, Kavanagh BP, Klinck JR, Cheng DC, DeMajo WC, Walker PM, Johnston KW, Sandler AN: Epidural bupivacaine-morphine analgesia *versus* patient-controlled analgesia following abdominal aortic surgery: Analgesic, respiratory, and myocardial effects. *ANESTHESIOLOGY* 1998; 89:585-93

9. Capdevila X, Barthelet Y, Biboulet P, Ryckwaert Y, Rubenovitch J, d'Athis F: Effects of perioperative analgesic technique on the surgical outcome and duration of rehabilitation after major knee surgery. *ANESTHESIOLOGY* 1999; 91:8-15

10. Carli F, Trudel JL, Belliveau P: The effect of intraoperative thoracic epidural anesthesia and postoperative analgesia on bowel function after colorectal surgery: A prospective, randomized trial. *Dis Colon Rectum* 2001; 44:1083-9

11. Carli F, Mayo N, Klubien K, Schrick T, Trudel J, Belliveau P: Epidural analgesia enhances functional exercise capacity and health-related quality of life after colon surgery: Results of a randomized trial. *ANESTHESIOLOGY* 2002; 97:540-9

12. Chen PP, Cheam EW, Ma M, Lam KK, Ngan Kee WD, Gin T: Patient-controlled pethidine after major upper abdominal surgery: Comparison of the epidural and intravenous routes. *Anesthesia* 2001; 56:1106-12

13. Cohen BE, Hartman MB, Wade JT, Miller JS, Gilbert R, Chapman TM: Postoperative pain control after lumbar spine fusion: Patient-controlled analgesia *versus* continuous epidural analgesia. *Spine* 1997; 22:1892-6

14. Cooper DW, Saleh U, Taylor M, Whyte S, Ryall D, Kokri MS, Desira WR, Day H, McArthur E: Patient-controlled analgesia: Epidural fentanyl and i.v. morphine compared after caesarean section. *Br J Anaesth* 1999; 82:366-70

15. Cooper DW, Ryall DM, Desira WR: Extradural fentanyl for postoperative analgesia: Predominant spinal or systemic action? *Br J Anaesth* 1995; 74:184-7

16. Correll DJ, Viscusi ER, Grunwald Z, Moore JH Jr: Epidural analgesia compared with intravenous morphine patient-controlled analgesia: Postoperative outcome measures after mastectomy with immediate TRAM flap breast reconstruction. *Reg Anesth Pain Med* 2001; 26:444-9

17. Flisberg P, Tornebrandt K, Walther B, Lundberg J: Pain relief after esophagectomy: Thoracic epidural analgesia is better than parenteral opioids. *J Cardiothorac Vasc Anesth* 2001; 15:282-7

18. George KA, Wright PM, Chisakuta AM, Rao NV: Thoracic epidural analgesia compared with patient controlled intravenous morphine after upper abdominal surgery. *Acta Anaesthesiol Scand* 1994; 38:808-12

19. Jay C, Beaussier M, Gustafsson U, Letournier Y, Nathan N, Plaud B, Tran G, Varlet C, Marty J: Continuous epidural infusion of ropiva-

## Appendix: Included Articles

1. Allaire PH, Messick JM Jr, Oesterling JE, Byer DE, Myers RP, Lieber MM, Chantigian RC, Welna JO, Patterson DE, Blute ML: A prospective randomized comparison of epidural infusion of fentanyl and intravenous administration of morphine by patient-controlled analgesia after radical retropubic prostatectomy. *Mayo Clin Proc* 1992; 67:1031-41

caine for postoperative analgesia after major abdominal surgery: Comparative study with i.v. PCA morphine. *Br J Anaesth* 1998; 81:887-92

20. Joshi GP, McCarroll SM, O'Rourke K: Postoperative analgesia after lumbar laminectomy: Epidural fentanyl infusion *versus* patient-controlled intravenous morphine. *Anesth Analg* 1995; 80:511-4

21. Kampe S, Randebrock G, Kiencke P, Hunseler U, Cranfield K, Konig DP, Diefenbach C: Comparison of continuous epidural infusion of ropivacaine and sufentanil with intravenous patient-controlled analgesia after total hip replacement. *Anesthesia* 2001; 56:1189-93

22. Klasen JA, Opitz SA, Melzer C, Thiel A, Hempelmann G: Intra-articular, epidural, and intravenous analgesia after total knee arthroplasty. *Acta Anaesthesiol Scand* 1999; 43:1021-6

23. Licker M, Suter PM, Krauer F, Rifat NK: Metabolic response to lower abdominal surgery: Analgesia by epidural blockade compared with intravenous opiate infusion. *Eur J Anaesthesiol* 1994; 11:193-9

24. Liu S, Carpenter RL, Mulroy MF, Weissman RM, McGill TJ, Rupp SM, Allen HW: Intravenous *versus* epidural administration of hydromorphone: Effects on analgesia and recovery after radical retropubic prostatectomy. *ANESTHESIOLOGY* 1995; 82:682-8

25. Liu SS, Carpenter RL, Mackey DC, Thirlby RC, Rupp SM, Shine TS, Feinglass NG, Metzger PP, Fulmer JT, Smith SL: Effects of perioperative analgesic technique on rate of recovery after colon surgery. *ANESTHESIOLOGY* 1995; 83:757-65

26. Madej TH, Wheatley RG, Jackson IJ, Hunter D: Hypoxaemia and pain relief after lower abdominal surgery: comparison of extradural and patient-controlled analgesia. *Br J Anaesth* 1992; 69:554-7

27. Mann C, Pouzeratte Y, Boccard G, Peccoux C, Vergne C, Brunat G, Domergue J, Millat B, Colson P: Comparison of intravenous or epidural patient-controlled analgesia in the elderly after major abdominal surgery. *ANESTHESIOLOGY* 2000; 92:433-41

28. Menigaux C, Guignard B, Fletcher D, Sessler DI, Levron JC, Chauvin M: More epidural than intravenous sufentanil is required to provide comparable postoperative pain relief. *Anesth Analg* 2001; 93:472-6

29. Moon MR, Luchette FA, Gibson SW, Crews J, Sudarshan G, Hurst JM, Davis K Jr, Johannigman JA, Frame SB, Fischer JE: Prospective, randomized comparison of epidural *versus* parenteral opioid analgesia in thoracic trauma. *Ann Surg* 1999; 229:684-91

30. Motamed C, Spencer A, Farhat F, Bourgain JL, Lasser P, Jayr C: Postoperative hypoxaemia: Continuous extradural infusion of bupivacaine and morphine *versus* patient-controlled analgesia with intravenous morphine. *Br J Anaesth* 1998; 80:742-7

31. Nendick M: Patient satisfaction with postoperative analgesia. *Nurs Stand* 2000; 14:32-7

32. Parker RK, White PF: Epidural patient-controlled analgesia: An alternative to intravenous patient-controlled analgesia for pain relief after cesarean delivery. *Anesth Analg* 1992; 75:245-51

33. Paulsen EK, Porter MG, Helmer SD, Linhardt PW, Kliever ML: Thoracic epidural *versus* patient-controlled analgesia in elective bowel resections. *Am J Surg* 2001; 182:570-7

34. Priestley MC, Cope L, Halliwell R, Gibson P, Chard RB, Skinner M, Klineberg PL: Thoracic epidural anesthesia for cardiac surgery: The effects on tracheal intubation time and length of hospital stay. *Anesth Analg* 2002; 94:275-82

35. Rigg JR, Jamrozik K, Myles PS, Silbert BS, Peyton PJ, Parsons RW, Collins KS; MASTER Anaesthesia Trial Study Group: Epidural anesthesia and analgesia and outcome of major surgery: A randomized trial. *Lancet* 2002; 359:1276-82

36. Schricker T, Wykes L, Eberhart L, Lattermann R, Mazza L, Carli F: The anabolic effect of epidural blockade requires energy and substrate supply. *ANESTHESIOLOGY* 2002; 97:943-51

37. Schumann R, Shikora S, Weiss JM, Wurm H, Strassels S, Carr DB: A comparison of multimodal perioperative analgesia to epidural pain management after gastric bypass surgery. *Anesth Analg* 2003; 96:469-74

38. Senagore AJ, Delaney CP, Mekhail N, Dugan A, Fazio VW: Randomized clinical trial comparing epidural anesthesia and patient-controlled analgesia after laparoscopic segmental colectomy. *Br J Surg* 2003; 90:1195-9

39. Senturk M, Ozcan PE, Talu GK, Kiyan E, Camci E, Ozyalcin S, Dilege S, Pembeci K: The effects of three different analgesia techniques on long-term postthoracotomy pain. *Anesth Analg* 2002; 94:11-5

40. Sinatra RS, Sevarino FB, Paige D: Patient-controlled analgesia with sufentanil: A comparison of two different methods of administration. *J Clin Anesth* 1996; 8:123-9

41. Singelyn FJ, Deyaert M, Joris D, Pendevel E, Gouverneur JM: Effects of intravenous patient-controlled analgesia with morphine, continuous epidural analgesia, and continuous three-in-one block on postoperative pain and knee rehabilitation after unilateral total knee arthroplasty. *Anesth Analg* 1998; 87:88-92

42. Slinger P, Shennib H, Wilson S: Postthoracotomy pulmonary function: A comparison of epidural *versus* intravenous meperidine infusions. *J Cardiothorac Vasc Anesth* 1995; 9:128-34

43. Steinberg RB, Liu SS, Wu CL, Mackey DC, Grass JA, Ahlen K, Jeppsson L: Comparison of ropivacaine-fentanyl patient-controlled epidural analgesia with morphine intravenous patient-controlled analgesia for perioperative analgesia and recovery after open colon surgery. *J Clin Anesth* 2002; 14:571-7

44. Tavernier B, Tellez J, Triboulet JP: Thoracic epidural bupivacaine combined with opioid for esophagectomy. *Surgery* 1998; 123:113-4

45. Tsui SL, Lee DK, Ng KF, Chan TY, Chan WS, Lo JW: Epidural infusion of bupivacaine 0.0625% plus fentanyl 3.3 micrograms/ml provides better postoperative analgesia than patient-controlled analgesia with intravenous morphine after gynaecological laparotomy. *Anaesth Intensive Care* 1997; 25:476-81

46. Volk T, Schenk M, Voigt K, Tohtz S, Putzier M, Kox WJ: Postoperative epidural anesthesia preserves lymphocyte, but not monocyte, immune function after major spine surgery. *Anesth Analg* 2004; 98:1086-92

47. Weinbroum AA, Bender B, Nirkin A, Chazan S, Meller I, Kolender Y: Dextromethorphan-associated epidural patient-controlled analgesia provides better pain- and analgesics-sparing effects than dextromethorphan-associated intravenous patient-controlled analgesia after bone-malignancy resection: A randomized, placebo-controlled, double-blinded study. *Anesth Analg* 2004; 98:714-22

48. Welchew EA, Breen DP: Patient-controlled on-demand epidural fentanyl: A comparison of patient-controlled on-demand fentanyl delivered epidurally or intravenously. *Anesthesia* 1991; 46:438-41

49. Wheatley RG, Somerville ID, Sapsford DJ, Jones JG: Postoperative hypoxaemia: Comparison of extradural, intramuscular and patient-controlled opioid analgesia. *Br J Anaesth* 1990; 64:267-75

50. Wulf H, Biscoping J, Beland B, Bachmann-Mennenga B, Motsch J: Ropivacaine epidural anesthesia and analgesia *versus* general anesthesia and intravenous patient-controlled analgesia with morphine in the perioperative management of hip replacement. Ropivacaine Hip Replacement Multicenter Study Group. *Anesth Analg* 1999; 89:111-6
